# Supplementary material
Source: PubMed Central journal article supplement (PMC3683351)
Supplement: NIHMS468853-supplement-Supp_Table_S1.pdf [file NIHMS468853-supplement-Supp_Table_S1.pdf]

Table I. Pesticides and steroid hormones analyzed for in extracts of the polar organic chemical integrative samplers (POCIS) deployed at the Elkhorn River Research Station.

| <b>Pesticides</b>               |                                  |
|---------------------------------|----------------------------------|
| Acetochlor                      | Norflorazon                      |
| Alachlor                        | Pendimethalin                    |
| Atrazine                        | Permethrin                       |
| Butylate                        | Prometon                         |
| Chlorthalonil                   | Propachlor                       |
| Cyanazine                       | Propazine                        |
| Deethylatrazine                 | S-Ethyl-                         |
| Deisopropylatrazine             | dipropylthiocarbamate            |
| Dimethenamid                    | Simazine                         |
| Metolachlor                     | Telfluthrin                      |
| Metribuzin                      | Trifluralin                      |
| <b>Steroid Hormones</b>         |                                  |
| Androsterone                    | 17 $\alpha$ -Hydroxyprogesterone |
| 4-Androstenedione               | Melengesterol Acetate            |
| Epitestosterone                 | Testosterone                     |
| 17 $\alpha$ -Ethylnyl Estradiol | $\alpha$ -Trenbolone             |
| $\alpha$ -Estradiol             | $\beta$ -Trenbolone              |
| $\beta$ -Estradiol              | $\alpha$ -Zearalanol             |
| Estriol                         | $\alpha$ -Zearalenol             |
| Estrone                         | $\beta$ -Zearalenol              |
| Progesterone                    |                                  |
